# Supplementary material
Source: Research Square preprint supplement (doi:10.21203/rs.3.rs-8691966/v1)
Supplement: Supplementary file 1 [file f40e3494b91ed0c0022e3492.docx]

Additional file 1. Results of a univariate logistic regression analyzing the relationship between gingival biotype and facial typology characteristics.

| **Trait** | **OR** | **95%CI** | | **p** |
| --- | --- | --- | --- | --- |
| **Tooth 12** | | | | |
| Zy-Zy [mm] | 0.946 | 0.868 | 1.031 | 0.205 |
| N-Me [mm] | 1.01 | 0.939 | 1.086 | 0.788 |
| FI | 1.048 | 0.969 | 1.134 | 0.242 |
| **Tooth 11** | | | | |
| Zy-Zy [mm] | 0.994 | 0.927 | 1.066 | 0.869 |
| N-Me [mm] | 0.932 | 0.871 | 0.997 | 0.04 * |
| FI | 0.941 | 0.88 | 1.006 | 0.075 |
| **Tooth 21** | | | | |
| Zy-Zy [mm] | 0.931 | 0.864 | 1.003 | 0.059 |
| N-Me [mm] | 0.978 | 0.92 | 1.04 | 0.48 |
| FI | 1.027 | 0.963 | 1.094 | 0.42 |
| **Tooth 22** | | | | |
| Zy-Zy [mm] | 0.924 | 0.844 | 1.01 | 0.083 |
| N-Me [mm] | 0.955 | 0.889 | 1.026 | 0.21 |
| FI | 1.009 | 0.936 | 1.087 | 0.821 |

p - univariate logistic regressions

* statistically significant (p<0.05)

Additional file 2. Multivariable linear regression analysis – predictors of GT for individual teeth. Values are presented as regression coefficients β (95% CI) and p-values. The reference categories were female sex and no history of orthodontic treatment.

| Tooth | Male vs Female  β (95% CI) p value | Orthodontic treatment in the past (yes vs no)  β (95% CI) p value | FI  β (95% CI) p value |
| --- | --- | --- | --- |
| 12 | 0,032 (−0,079 - 0,142)  p = 0,567 | −0,066 (−0,169 - 0,037)  p = 0,203 | −0,001 (−0,007 - 0,005)  p = 0,771 |
| 11 | −0,021 (−0,153 - 0,111)  p = 0,755 | 0,049 (−0,073 - 0,172)  p = 0,423 | 0,003 (−0,005 - 0,010)  p = 0,504 |
| 21 | 0,030 (−0,094 - 0,154)  p = 0,630 | 0,059 (−0,056 - 0,175)  p = 0,307 | −0,001 (−0,009 - 0,006)  p = 0,677 |
| 22 | **0,162 (0,045 - 0,279)**  **p = 0,007*** | −0,002 (−0,110 - 0,107)  p = 0,978 | −0,003 (−0,010 - 0,003)  p = 0,324 |
| 42 | **0,142 (0,032 - 0,252)**  **p = 0,012*** | −0,022 (−0,124 - 0,080)  p = 0,670 | 0,000 (−0,006 - 0,006)  p = 0,966 |
| 41 | 0,100 (−0,005 - 0,205)  p = 0,061 | −0,020 (−0,117 - 0,077)  p = 0,686 | −0,003 (−0,009 - 0,003)  p = 0,364 |
| 31 | 0,090 (−0,020 - 0,200)  p = 0,106 | −0,061 (−0,163 - 0,041)  p = 0,237 | **−0,008 (−0,014 - −0,002)**  **p = 0,011*** |
| 32 | 0,085 (−0,013 - 0,182)  p = 0,086 | −0,006 (−0,096 - 0,085)  p = 0,902 | **−0,006 (−0,011 - 0,000)**  **p = 0,046*** |

Additional file 3. Multivariable linear regression analysis – predictors of AG for individual teeth. Values are presented as regression coefficients β (95% CI) and p-values. The reference categories were female sex and no history of orthodontic treatment.

| Tooth | Male vs Female  β (95% CI) p value | Orthodontic treatment in the past (yes vs no)  β (95% CI) p value | FI  β (95% CI) p value |
| --- | --- | --- | --- |
| 12 | 0,359 (−0,418 - 1,137)  p = 0,359 | 0,035 (−0,688 - 0,757)  p = 0,923 | −0,006 (−0,050 - 0,039)  p = 0,799 |
| 11 | **0,743 (0,038 - 1,448)**  **p = 0,039*** | 0,040 (−0,615 - 0,696)  p = 0,902 | 0,004 (−0,037 - 0,044)  p = 0,860 |
| 21 | 0,229 (−0,441 - 0,900)  p = 0,496 | −0,130 (−0,753 - 0,493)  p = 0,678 | 0,009 (−0,029 - 0,047)  p = 0,636 |
| 22 | 0,412 (−0,456 - 1,280)  p = 0,345 | 0,120 (−0,687 - 0,926)  p = 0,768 | 0,010 (−0,040 - 0,059)  p = 0,694 |
| 42 | **0,927 (0,230 - 1,624)**  **p = 0,010*** | −0,022 (−0,670 - 0,625)  p = 0,945 | 0,035 (−0,005 - 0,075)  p = 0,083 |
| 41 | **0,886 (0,177 - 1,596)**  **p = 0,015*** | 0,088 (−0,571 - 0,747)  p = 0,790 | 0,022 (−0,018 - 0,063)  p = 0,273 |
| 31 | **0,951 (0,162 - 1,740)**  **p = 0,019*** | 0,006 (−0,727 - 0,739)  p = 0,986 | 0,024 (−0,021 - 0,069)  p = 0,295 |
| 32 | **0,773 (0,051 - 1,495)**  **p = 0,036*** | −0,050 (−0,721 - 0,620)  p = 0,881 | 0,035 (−0,007 - 0,076)  p = 0,098 |
